# Supplementary material for: Longitudinal Metagenomic Analysis of Hospital Air Identifies Clinically Relevant Microbes
Source: PubMed Central journal article supplement (PMC4970769; doi:10.1371/journal.pone.0160124), 2016-08-02
Supplement: pone.0160124.s001.pdf [file pone.0160124.s001.pdf]

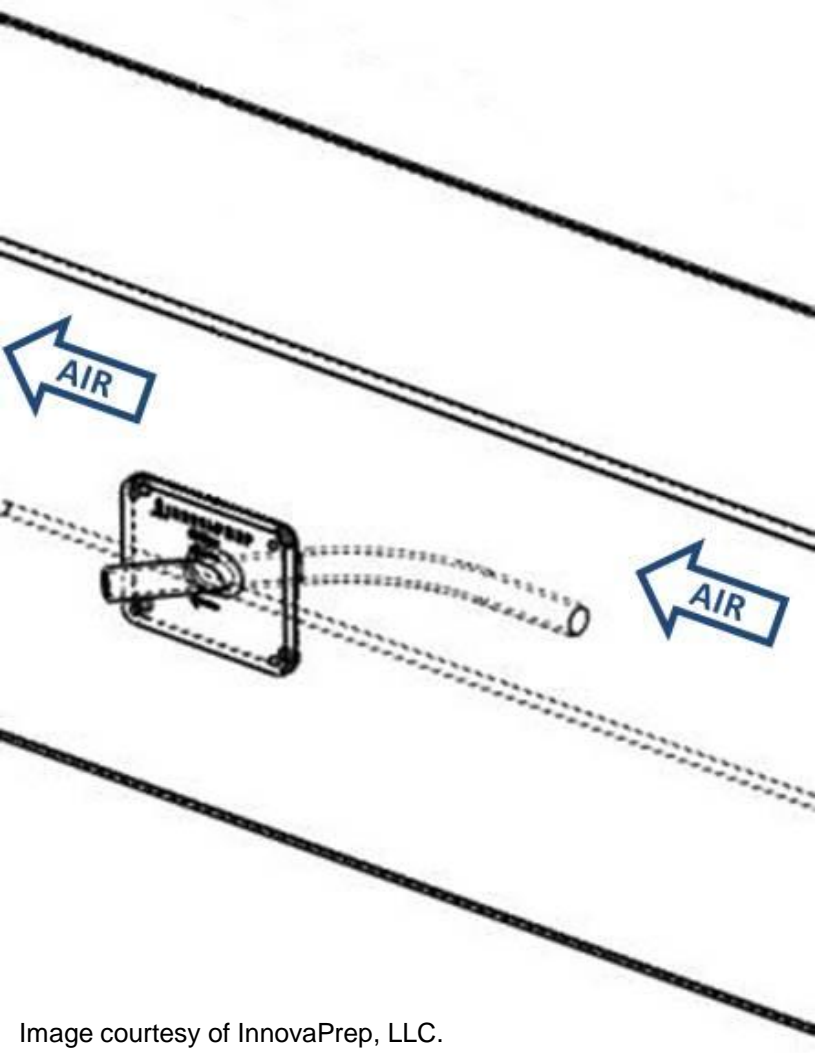

Image courtesy of InnovaPrep, LLC.
