# Supplementary material for: Longitudinal Metagenomic Analysis of Hospital Air Identifies Clinically Relevant Microbes
Source: PubMed Central journal article supplement (PMC4970769; doi:10.1371/journal.pone.0160124), 2016-08-02
Supplement: pone.0160124.s002.pdf [file pone.0160124.s002.pdf]

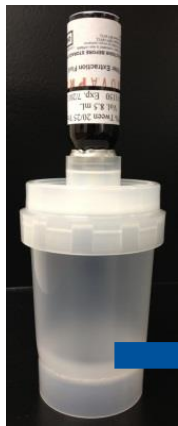

**Air Filter  
Elution**

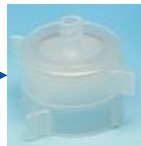

**Filtration**  
0.2  $\mu\text{m}$

filter

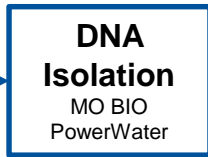

liquid  
filtrate

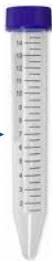

**Free DNA  
Precipitation**

**Qubit,  
qPCR**

**SMS Library**  
Illumina NexteraXT

**NGS**  
Illumina HiSeq
