# Supplementary material for: Longitudinal Metagenomic Analysis of Hospital Air Identifies Clinically Relevant Microbes
Source: PubMed Central journal article supplement (PMC4970769; doi:10.1371/journal.pone.0160124), 2016-08-02

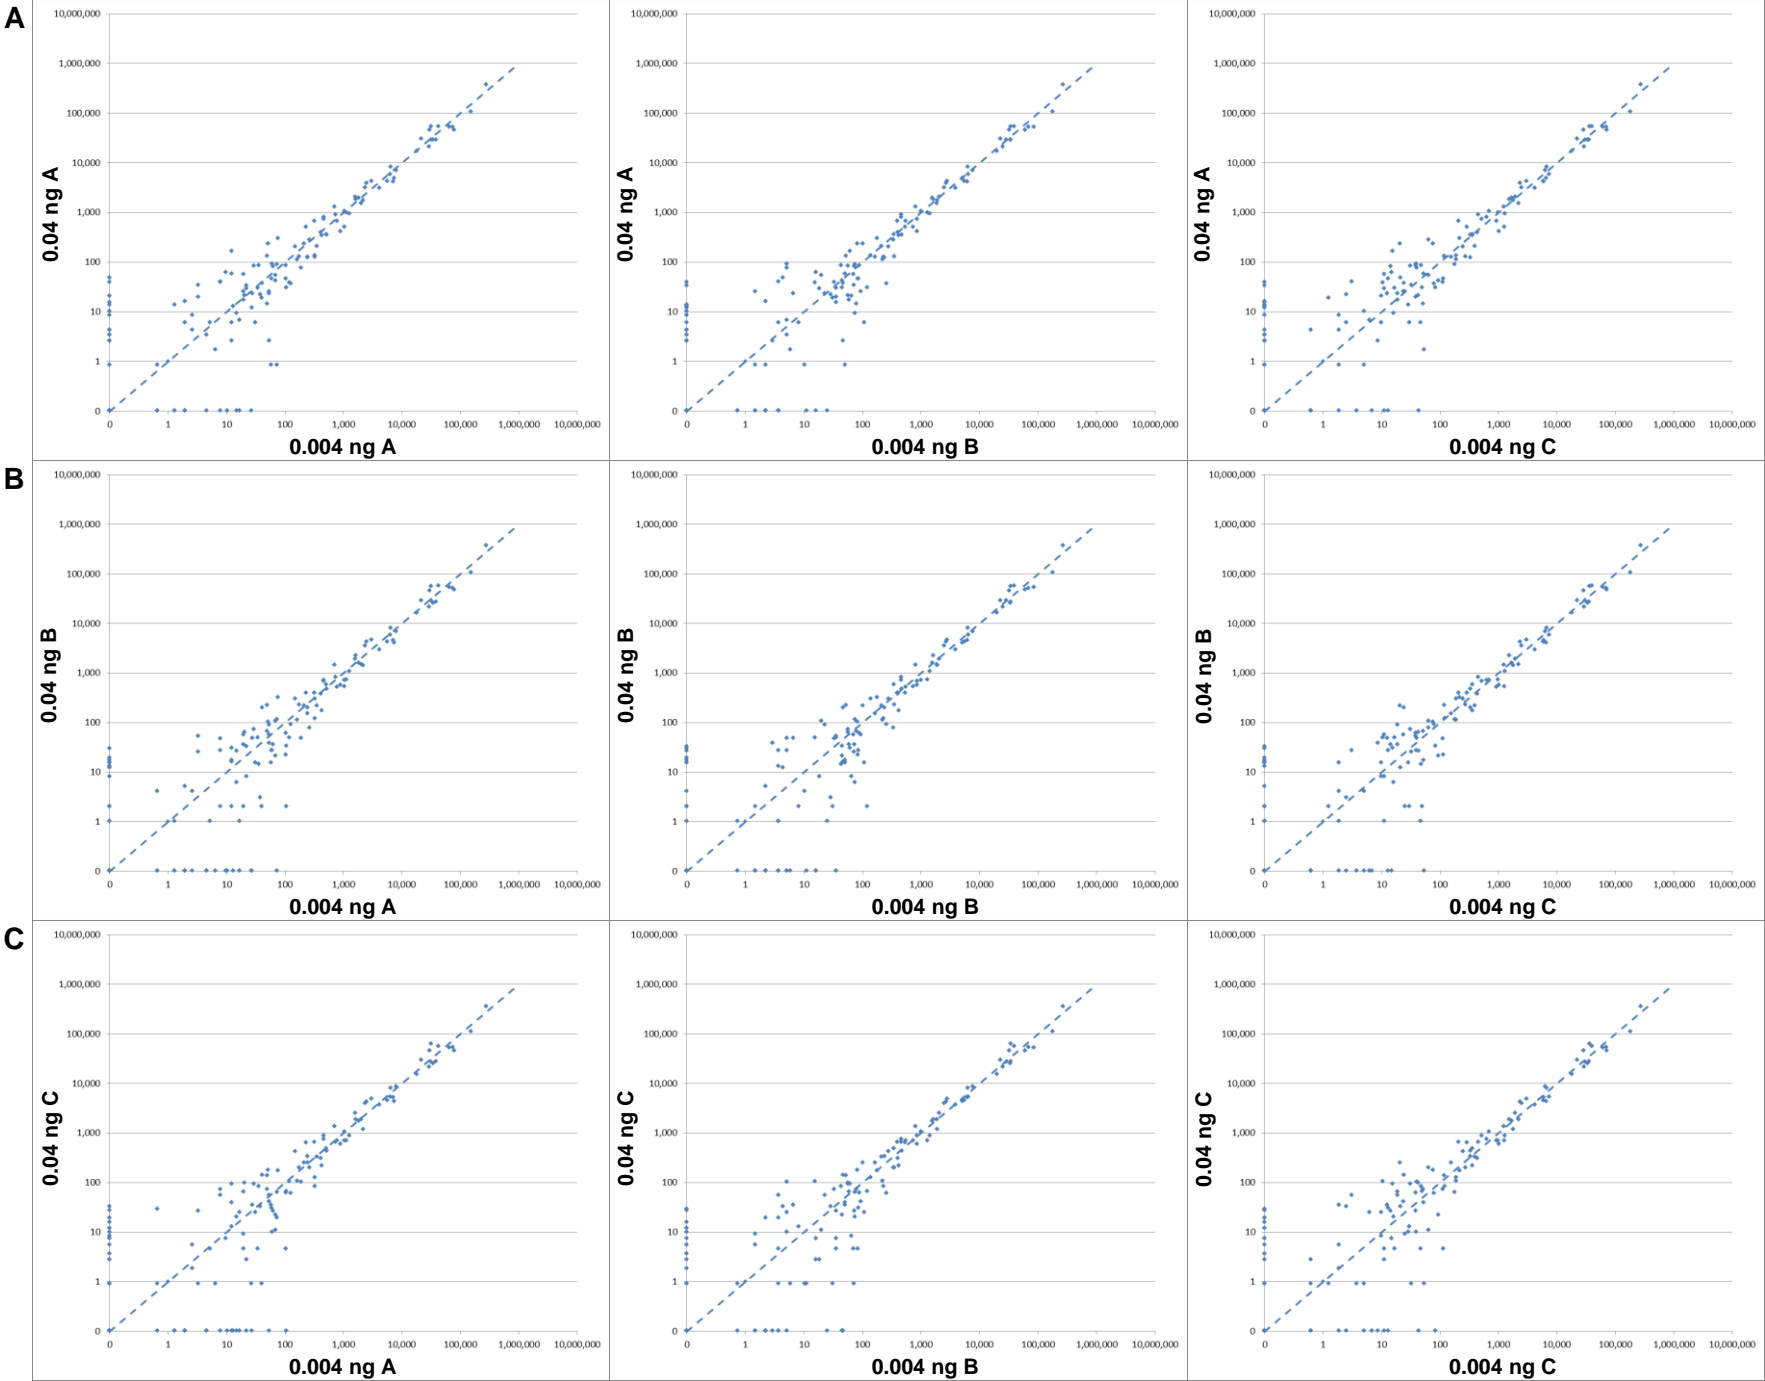

Supplement: pone.0160124.s003.pdf [file pone.0160124.s003.pdf]
